# Supplementary material for: Electroactive nanofibrous membrane with temperature monitoring for wound healing
Source: Royal Society of Chemistry journal article supplement (doi:10.1039/d3ra01665j), 2023-01-01
Supplement: d3ra01665j1.pdf [file d3ra01665j1.pdf]

## Supplementary Material for on-line publication only

### Electroactive nanofibrous dressing with temperature monitoring for wound healing

Liguo Yang<sup>a1</sup>, Chenglin Li<sup>b1</sup>, Xiangyan Zhang<sup>c\*</sup>, Yongxin Li<sup>c\*</sup>, Shangpeng Liu<sup>a</sup>, Jiwei Li<sup>\*a, d</sup>

<sup>a</sup> College of Textiles and Clothing, Industrial Research Institute of Nonwovens and Technical Textiles, Qingdao University, Qingdao, 266071, China.

<sup>b</sup> Department of Biochemistry and Microbiology, Qingdao University Medical College, Qingdao University, Qingdao, 266003, China.

<sup>c</sup> Department of Pathology, Department of Vascular Surgery, The Affiliated Hospital of Qingdao University, Qingdao University, Qingdao, 266003, China.

<sup>d</sup> Shandong Center for Engineered Nonwovens, Qingdao, 266071, China.

<sup>1</sup> These authors contributed equally

**Corresponding Author\*** Emails: [jiweili@qdu.edu.cn](mailto:jiweili@qdu.edu.cn) (Jiwei Li); [feige5552006@126.com](mailto:feige5552006@126.com) (Xiangyan Zhang); [li.yongxin@outlook.com](mailto:li.yongxin@outlook.com) (Yongxin Li);

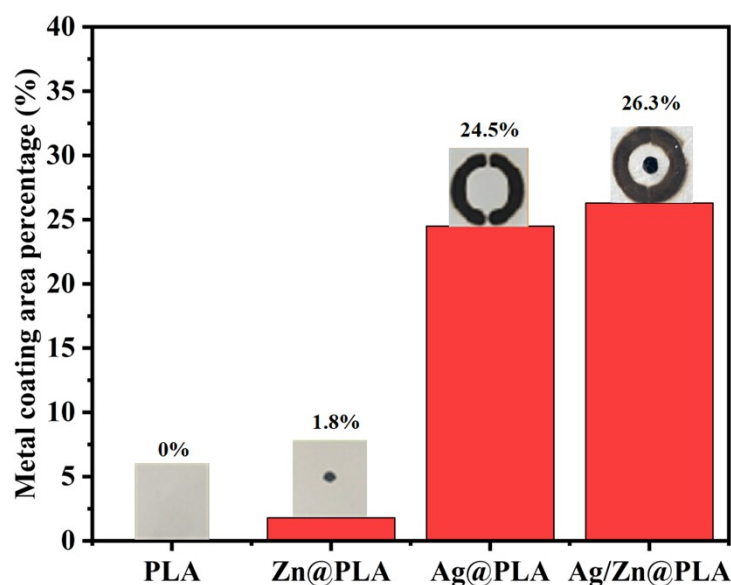

Figure S1. Metal coating area percentage of different samples.

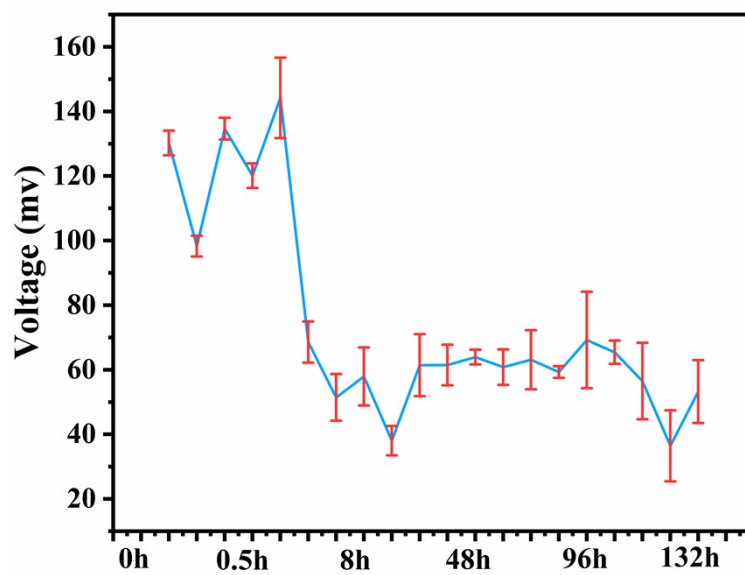

**Figure S2.** The measured voltage of Ag/Zn@PLA at different time.

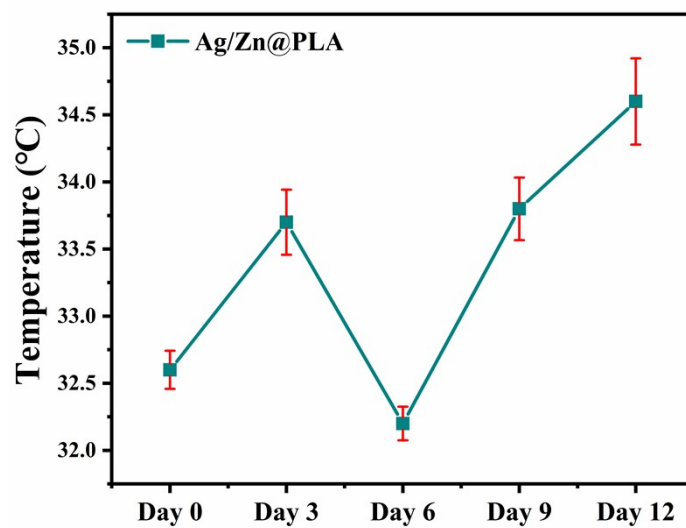

**Figure S3.** The monitored temperature change of Ag/Zn@PLA treated wound at different time.

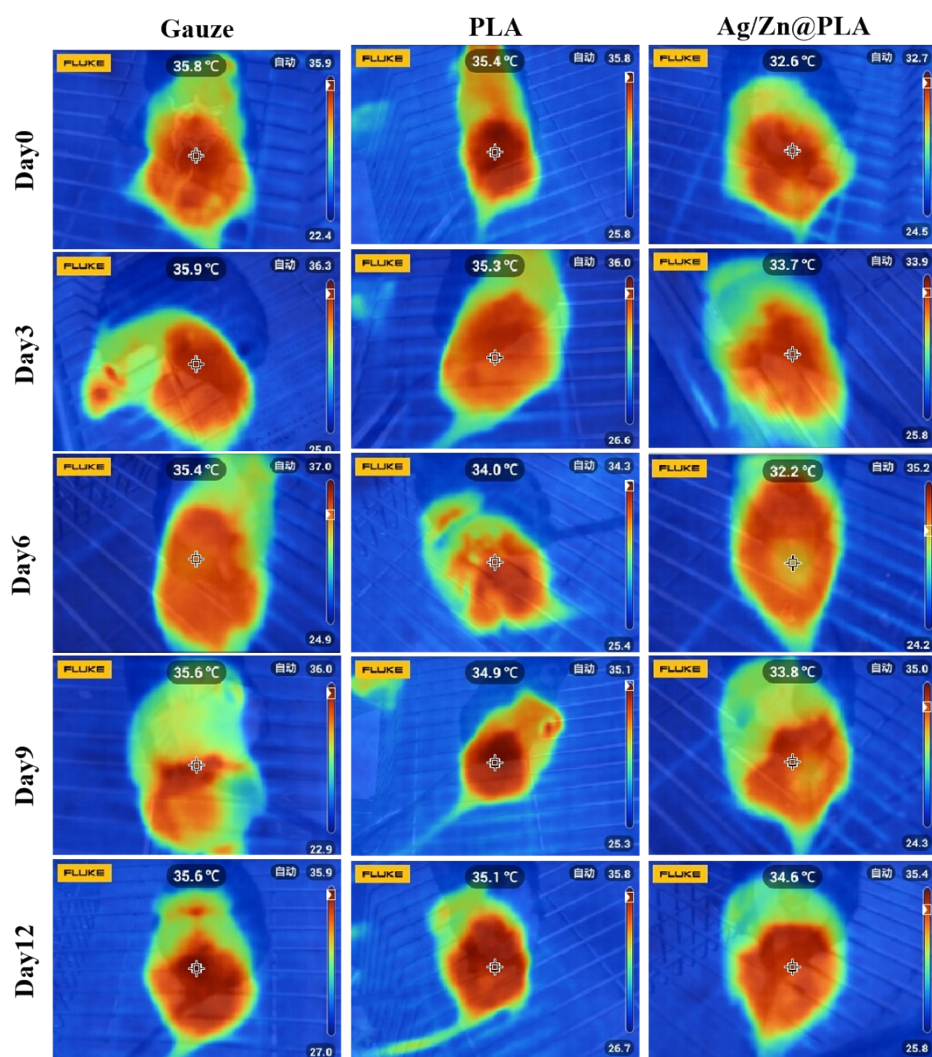

**Figure S4.** The monitored temperature change of skin wounds by an infrared imager.
